# Supplementary material for: Tailoring substrate adhesion via flexible chain architecture design in benzoheterocycle polyimide protective coatings
Source: Royal Society of Chemistry journal article supplement (doi:10.1039/d5ra05693d), 2025-01-01
Supplement: d5ra05693d1.pdf [file d5ra05693d1.pdf]

## Supplementary Material

### **Tailoring substrate adhesion via flexible chain architecture design in benzoheterocycle polyimide protective coatings**

Feng Guo<sup>a</sup>, Wei Wang<sup>b</sup>, Guangtao Qian<sup>c</sup>, Dandan Li<sup>a,d</sup>, Yongfeng Li<sup>c\*</sup>

<sup>a</sup>State Key Laboratory of Advanced Fiber Materials, Center for Advanced Low-dimension Materials, College of Materials Science and Engineering, Donghua University, Shanghai, 201620, China

<sup>b</sup>School of Materials Science and Engineering, NingboTech University, Ningbo 315100, China

<sup>c</sup>Shanghai Collaborative Innovation Center of High Performance Fibers and Composites (Province-Ministry Joint), Center for Civil Aviation Composites, Donghua University, Shanghai, 201620, China

<sup>d</sup>School of Materials Science and Engineering, Shanghai University of Engineering Science, Shanghai 201620, PR China

\*Corresponding authors E-mail: (Y. Li) [yfli@dhu.edu.cn](mailto:yfli@dhu.edu.cn)

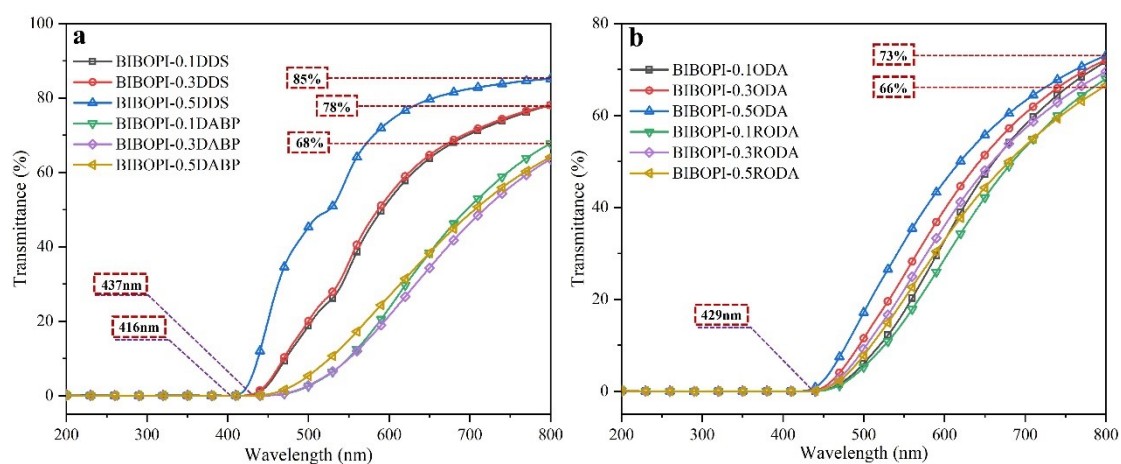

**Fig. S1** UV-visible spectra of (a) BIBOPs containing DDS and DABP diamine, (b) BIBOPs containing ODA and RODA diamine.

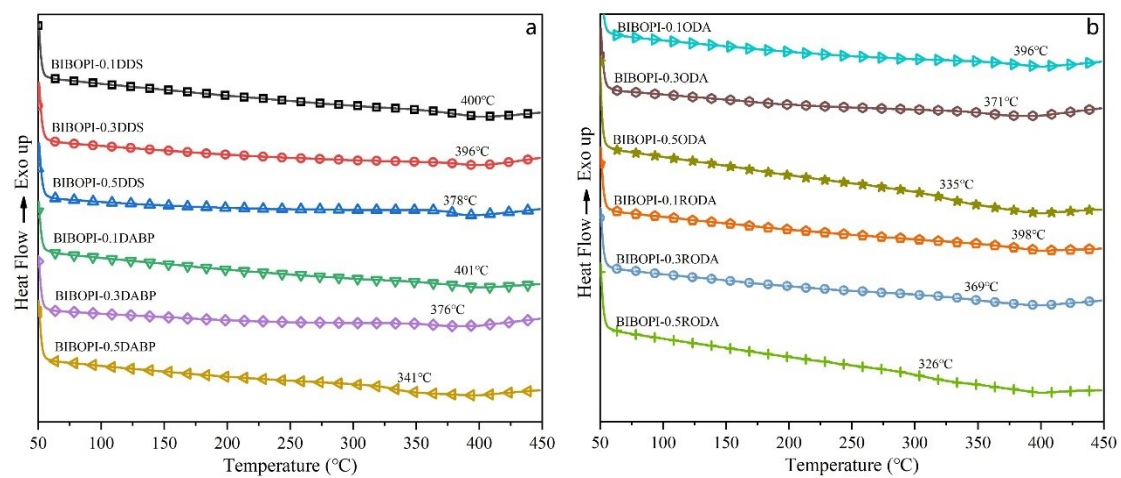

**Fig. S2** DSC curves of (a) BIBOPIs containing DDS and DABP diamine, (b) BIBOPIs containing ODA and RODA diamine.

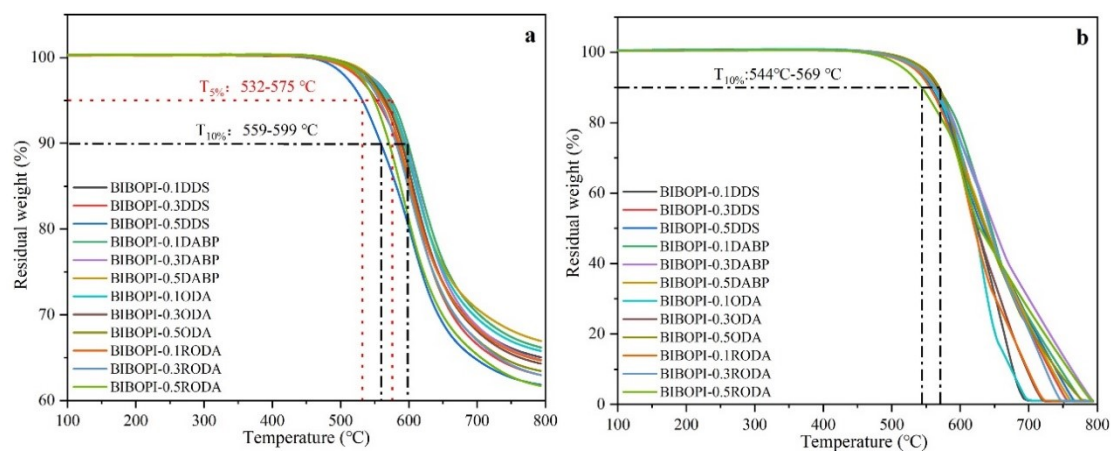

**Fig. S3** TGA curves of BIBOPIs (a under N<sub>2</sub> atmosphere, b under air atmosphere)

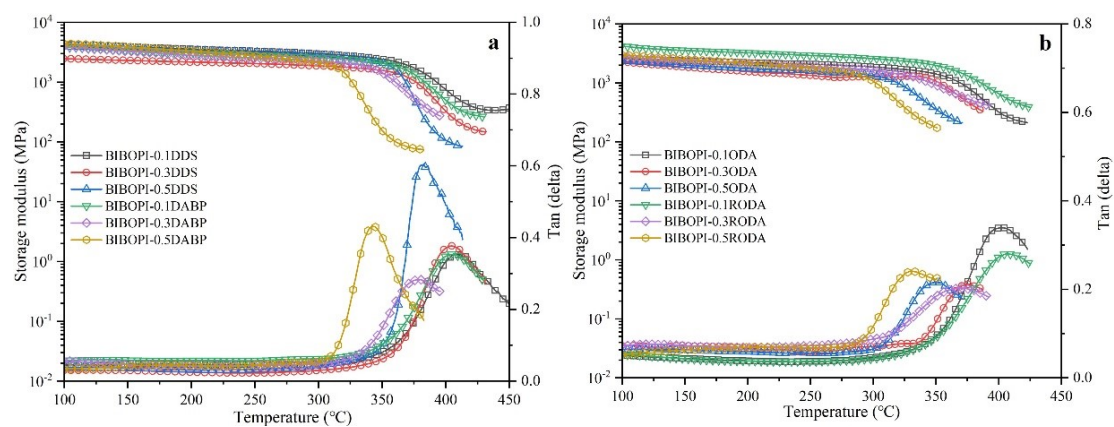

**Fig. S4** DMA curves of (a) BIBOPIs containing DDS and DABP diamine, (b) BIBOPIs containing ODA and RODA diamine.

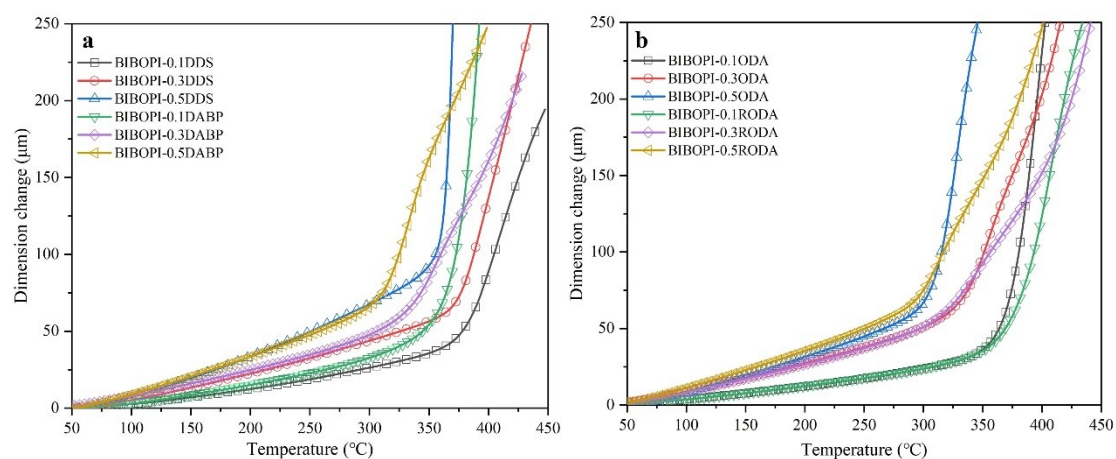

**Fig. S5** TMA curves of (a) BIBOPIs containing DDS and DABP diamine, (b) BIBOPIs containing ODA and RODA diamine.

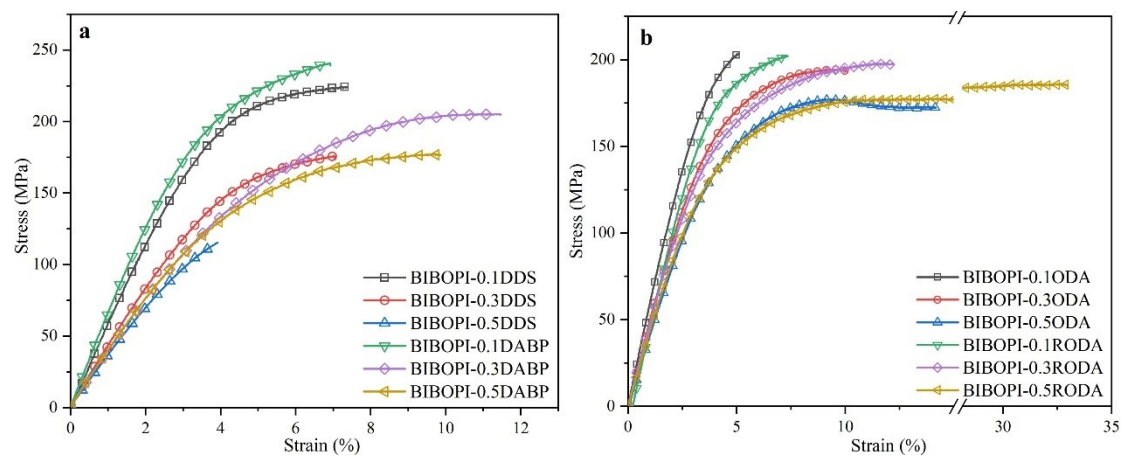

**Fig. S6** Stress-strain curves of (a) BIBOPIs containing DDS and DABP diamine, (b) BIBOPIs containing ODA and RODA diamine.
